# Supplementary material for: The Post-Traumatic Stress Disorder Checklist for DSM-5: Psychometric Properties of the Italian Version
Source: MDPI journal article supplement (doi:10.3390/ijerph19095282), 2022-04-26
Supplement: s1 [file s1]

**Table S1.** Pearson's correlations among PCL items.

| Item | 1   | 2   | 3   | 4   | 5   | 6   | 7   | 8   | 9   | 10  | 11  | 12  | 13  | 14  | 15  | 16  | 17  | 18  | 19  |
|------|-----|-----|-----|-----|-----|-----|-----|-----|-----|-----|-----|-----|-----|-----|-----|-----|-----|-----|-----|
| 2    | .68 |     |     |     |     |     |     |     |     |     |     |     |     |     |     |     |     |     |     |
| 3    | .58 | .51 |     |     |     |     |     |     |     |     |     |     |     |     |     |     |     |     |     |
| 4    | .66 | .52 | .64 |     |     |     |     |     |     |     |     |     |     |     |     |     |     |     |     |
| 5    | .57 | .49 | .63 | .68 |     |     |     |     |     |     |     |     |     |     |     |     |     |     |     |
| 6    | .57 | .46 | .50 | .60 | .54 |     |     |     |     |     |     |     |     |     |     |     |     |     |     |
| 7    | .53 | .47 | .52 | .50 | .48 | .63 |     |     |     |     |     |     |     |     |     |     |     |     |     |
| 8    | .30 | .32 | .31 | .32 | .34 | .38 | .42 |     |     |     |     |     |     |     |     |     |     |     |     |
| 9    | .42 | .44 | .41 | .43 | .39 | .42 | .41 | .30 |     |     |     |     |     |     |     |     |     |     |     |
| 10   | .39 | .38 | .45 | .40 | .37 | .44 | .44 | .32 | .70 |     |     |     |     |     |     |     |     |     |     |
| 11   | .60 | .50 | .55 | .59 | .55 | .52 | .50 | .35 | .67 | .67 |     |     |     |     |     |     |     |     |     |
| 12   | .54 | .52 | .49 | .49 | .49 | .49 | .52 | .31 | .53 | .51 | .62 |     |     |     |     |     |     |     |     |
| 13   | .46 | .41 | .44 | .44 | .43 | .42 | .47 | .35 | .59 | .53 | .60 | .67 |     |     |     |     |     |     |     |
| 14   | .51 | .48 | .47 | .51 | .47 | .46 | .45 | .29 | .60 | .52 | .59 | .69 | .68 |     |     |     |     |     |     |
| 15   | .51 | .45 | .47 | .46 | .46 | .46 | .47 | .27 | .49 | .51 | .59 | .61 | .62 | .60 |     |     |     |     |     |
| 16   | .39 | .41 | .44 | .34 | .41 | .37 | .35 | .31 | .44 | .42 | .43 | .45 | .46 | .49 | .47 |     |     |     |     |
| 17   | .52 | .45 | .47 | .52 | .46 | .49 | .47 | .33 | .43 | .41 | .60 | .50 | .50 | .51 | .50 | .44 |     |     |     |
| 18   | .54 | .48 | .47 | .56 | .53 | .51 | .48 | .33 | .56 | .51 | .68 | .56 | .60 | .60 | .56 | .43 | .69 |     |     |
| 19   | .56 | .46 | .48 | .54 | .52 | .56 | .46 | .32 | .48 | .46 | .59 | .63 | .59 | .64 | .61 | .46 | .55 | .66 |     |
| 20   | .52 | .53 | .45 | .47 | .49 | .45 | .44 | .30 | .43 | .39 | .50 | .58 | .51 | .56 | .52 | .46 | .50 | .53 | .60 |

Note: all correlations are significant at  $p < .01$ . A higher color intensity indicates a stronger correlation.

**Table S2.** Factor loadings for the 7-factor structure model.

| Item | Factor             |              |                    |              |                          |                    |                      |
|------|--------------------|--------------|--------------------|--------------|--------------------------|--------------------|----------------------|
|      | 1. Re-experiencing | 2. Avoidance | 3. Negative affect | 4. Anhedonia | 5. Externalized behavior | 6. Anxious arousal | 7. Dysphoric arousal |
| 1    | 0.811              |              |                    |              |                          |                    |                      |
| 2    | 0.705              |              |                    |              |                          |                    |                      |
| 3    | 0.757              |              |                    |              |                          |                    |                      |
| 4    | 0.821              |              |                    |              |                          |                    |                      |
| 5    | 0.769              |              |                    |              |                          |                    |                      |
| 6    |                    | 0.821        |                    |              |                          |                    |                      |
| 7    |                    | 0.766        |                    |              |                          |                    |                      |
| 8    |                    |              | 0.428              |              |                          |                    |                      |
| 9    |                    |              | 0.795              |              |                          |                    |                      |
| 10   |                    |              | 0.778              |              |                          |                    |                      |
| 11   |                    |              | 0.875              |              |                          |                    |                      |
| 12   |                    |              |                    | 0.828        |                          |                    |                      |
| 13   |                    |              |                    | 0.812        |                          |                    |                      |

|    |       |       |       |       |
|----|-------|-------|-------|-------|
| 14 | 0.834 |       |       |       |
| 15 |       | 0.773 |       |       |
| 16 |       | 0.611 |       |       |
| 17 |       |       | 0.779 |       |
| 18 |       |       | 0.885 |       |
| 19 |       |       |       | 0.822 |
| 20 |       |       |       | 0.726 |

---

Note:  $p$  is <.001 for all factor loadings.
